# Supplementary material for: Nucleo-cytoplasmic shuttling of the endonuclease ankyrin repeats and LEM domain-containing protein 1 (Ankle1) is mediated by canonical nuclear export- and nuclear import signals
Source: PubMed Central journal article supplement (PMC4888674; doi:10.1186/s12860-016-0102-z), 2016-06-01

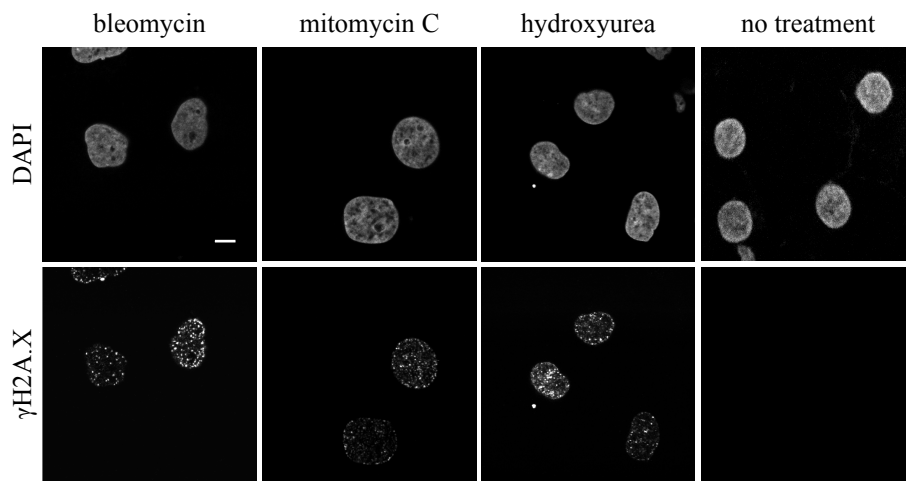

Supplement: 12860_2016_102_MOESM2_ESM.pdf [file 12860_2016_102_MOESM2_ESM.pdf]
